# Supplementary material
Source: MDPI journal article supplement (https://www.mdpi.com/2306-5729/7/2/20)
Supplement: s1 [file s1]

|                                                                                   |                                        |
|-----------------------------------------------------------------------------------|----------------------------------------|
|  | <h1>AP03 Technische Infrastruktur</h1> |
|                                                                                   | <h2>Ist-Analyse: Interview</h2>        |

## 1. Einleitung

*Ausgangspunkt ist die Forschungsfrage: Was ist der derzeitige Stand zum Thema Technische Infrastruktur im Bereich Daten in der Organisation/Unternehmen? Welcher Bedarf kann gut abgedeckt werden mit Ressourcen, die der Steiermark zur Verfügung stehen, und wo sehen Sie Lücken?*

### 1.1. Geplanter Ablauf:

- *Begrüßung/Vielen Dank für die Zeit*
- *Kurzer Umriss des Themas*

Wir erstellen im Rahmen des Projektes IDE@S ein Konzept für eine Dateninfrastruktur in der Steiermark. Dazu wird erhoben, was in der Steiermark im Bereich techn. Infrastruktur, humane Ressourcen und Dienstleistungen bereits vorhanden ist, und welche Lücken identifiziert werden können. Basierend auf diesen Informationen wird das Konzept erstellt - demnach ist es essentiell für uns mit den wichtigen Playern in der Steiermark zu sprechen, um deren Bedarf zu erheben und in das Konzept einfließen zu lassen. In unserem Interview geht es hauptsächlich um die technische Infrastruktur, wobei Sie auch sehen werden, dass der Zusammenhang zu den anderen Bereichen, besonders zu Dienstleistungen, klar sein soll.

- *Kurze Beschreibung des Interviewablaufs und Dauer*

Wir möchten mit dem Interview verschiedene Institutionen aus dem universitären Bereich, sowie der Privatwirtschaft und dem öffentlichen Bereich zu ihren verwendeten und benötigten Dateninfrastrukturen befragen. Wir werden hierbei ein besonderes Augenmerk auf die technische Infrastruktur legen. Das Interview behandelt Fragen zu der Arbeit mit Daten aus verschiedenen Perspektiven: Dateninfrastruktur, Arbeiter\*innen im Bereich Daten, und Bewertung der Lage in der Steiermark. Geplant ist, dass das Interview in 30-45 min abgeschlossen ist.

- *Datenschutzvereinbarung*

Wir erfassen ihre Daten (Namen, Position; Namen, Art und Größe (Anzahl MA, ein Standort oder mehrere) ihrer Institution). Für die Ausarbeitung des Konzeptes werden die Daten anonymisiert. Bevor wir Ihre Antworten abschließend speichern, erhalten Sie die Möglichkeit, diese noch einmal in einer Gesamtansicht zu prüfen und ggf. abzuändern.

Bei diesem Interview haben Sie gegenüber dem Informationsträger das Recht auf Auskunft sowie Löschung Ihrer personenbezogenen Daten. Sie können diese Einwilligungserklärung jederzeit widerrufen. Nutzen Sie hierzu dieses Formular [\[Widerrufsformular\]](#). Nach erfolgtem Widerruf werden Ihre Daten unverzüglich gelöscht.

## 2. Interview-Leitfaden

### 1 Information über den Interviewten/die Interviewte

|                                                                          |  |
|--------------------------------------------------------------------------|--|
| Name / Email                                                             |  |
| Position                                                                 |  |
| Name der Institution                                                     |  |
| Art der Institution (öffentlich, privat, universitär) + Kurzbeschreibung |  |
| Anzahl der Mitarbeiter*innen                                             |  |
| Ein Standort oder mehrere                                                |  |

### 2 Einstiegsfragen

2.1 Wie lang arbeiten sie bereits bei Ihrer Organisation/Firma?

|                |  |                |  |               |  |
|----------------|--|----------------|--|---------------|--|
| Unter 5 Jahren |  | 5 bis 10 Jahre |  | Über 10 Jahre |  |
|----------------|--|----------------|--|---------------|--|

2.2 Gehört eine der folgenden Daten-lastigen Aufgaben zu ihrer täglichen Arbeit?

( ) = nein, (x) = ja, (y) = teilweise/unregelmäßig

|                                          |  |                                         |  |
|------------------------------------------|--|-----------------------------------------|--|
| Nutzung von Speicherressourcen           |  | Externe Cloudressourcen                 |  |
| Nutzung von Rechenkapazität              |  | Eigene Fortbildung für Arbeit mit Daten |  |
| Data Analytics                           |  | Lehre für Arbeit mit Daten              |  |
| Artificial Intelligence/Machine Learning |  | Datenmanagement                         |  |
| Big Data Analytics                       |  | Kollaborative Arbeit mit Daten          |  |
| Datenarchivierung                        |  | Andere:                                 |  |

2.3 Inwieweit ist Ihre Arbeit mit Daten verknüpft?

|                           |  |                         |  |                          |  |
|---------------------------|--|-------------------------|--|--------------------------|--|
| Unter 25% der Arbeitszeit |  | Bis 50% der Arbeitszeit |  | Über 50% der Arbeitszeit |  |
|---------------------------|--|-------------------------|--|--------------------------|--|

### 3 Dateninfrastrukturen heute

3.1 Welche Infrastrukturen sind derzeit bei Ihnen in Betrieb?

|                    |  |               |  |
|--------------------|--|---------------|--|
| Rechencluster      |  | Cloudlösungen |  |
| Speicherressourcen |  | Andere:       |  |

3.2 Wie hat sich bei Ihrer Organisation/Firma die Arbeit mit Daten in den letzten Jahren geändert?

Skala 1-5: (1) = trifft nicht zu, (5) = trifft zu

|                                          |  |
|------------------------------------------|--|
| Bedarf an Daten ist (deutlich) gestiegen |  |
| Verwendung von Datenquellen erweitert    |  |
| Datenintensive Auswertungen nehmen zu    |  |
| Hohe benötigte Rechenleistungen          |  |
| Mehr Speicherbedarf                      |  |
| Andere:                                  |  |

3.3 Wie äußert sich diese Veränderung? Entweder Anschaffung neuer Infrastrukturen in-house (x) oder Nutzung von externen Anbietern (y)

|                                 |  |                                  |  |
|---------------------------------|--|----------------------------------|--|
| Repositorien oder Cloudlösungen |  | High Performance Computing (HPC) |  |
| Analytics Werkzeuge             |  | Docker System                    |  |
| Versionierungssysteme (zB. Git) |  | Andere:                          |  |

### 3.4 Hat Ihre Institution genügend Ressourcen für Dateninfrastrukturen?

|                                                                               |  |
|-------------------------------------------------------------------------------|--|
| <i>Ja, meine Institution hat genügend Ressourcen für Dateninfrastrukturen</i> |  |
| <i>Nein, derzeit stehen zu wenig Ressourcen zur Verfügung</i>                 |  |

### 3.5 Wo ist eine Lücke/Bedarf offensichtlich?

Antwort (offener Text):

### 3.6 Sind Sie mit der derzeitigen Situation zufrieden?

*Skala 1-5: (1) = nicht zufrieden, (5) = sehr zufrieden.* Antwort:

### 3.7 Sehen sie Änderungsbedarf? Wenn ja, wie würden Sie diese bewerten?

*Skala 1-5: (1) = wenig akut, (5) = sehr akut.* Antwort:

## 4 Arbeit mit Daten

### 4.1 Wie arbeiten Sie üblicherweise mit den Daten?

Antwort:

### 4.2 Auf welche der folgenden Standards oder Prozesse greifen Sie bei der Arbeit mit Daten zurück?

*( ) = nein, (x) = ja, (y) = teilweise*

|                                                |  |                                                     |  |
|------------------------------------------------|--|-----------------------------------------------------|--|
| <i>Datenmanagementpläne</i>                    |  | <i>Zertifizierte Repositorien (re3data listed?)</i> |  |
| <i>(Meta)Datenstandards</i>                    |  | <i>Open Source</i>                                  |  |
| <i>Internationale Repos (e.g. Zenodo, ...)</i> |  | <i>Proprietäre Software</i>                         |  |
| <i>Andere:</i>                                 |  |                                                     |  |

### 4.3 Welche Standards (Archivierung, Verarbeitung) und welche standardisierten Daten sind in Ihrem Bereich gängig?

Antwort:

### 4.4 Gibt es in Ihrer Disziplin bereits bestimmte Praktiken? Wenn ja, welche?

Antwort:

### 4.5 Welche Werkzeuge verwenden Sie bei der Arbeit mit Daten?

|                                   |  |                                      |  |
|-----------------------------------|--|--------------------------------------|--|
| <i>Digitale Dokumentation</i>     |  | <i>Distributed/Federated Storage</i> |  |
| <i>Ressource Scheduling Tools</i> |  | <i>Backupstrategien</i>              |  |
| <i>Big Data Techniken</i>         |  | <i>Workflowmanagement</i>            |  |
| <i>AI, Machine Learning</i>       |  | <i>Andere:</i>                       |  |

### 4.6 Mit welchen durchschnittlichen Datenmengen arbeiten Sie im Monat?

|                 |  |                      |  |                        |  |                        |  |                  |  |
|-----------------|--|----------------------|--|------------------------|--|------------------------|--|------------------|--|
| <i>Bis 1 GB</i> |  | <i>1 GB bis 1 TB</i> |  | <i>1 TB bis 100 TB</i> |  | <i>100 TB bis 1 PB</i> |  | <i>Über 1 PB</i> |  |
|-----------------|--|----------------------|--|------------------------|--|------------------------|--|------------------|--|

### 4.7 Sind Ihnen die FAIR Prinzipien bekannt? Antwort:

|                                                                      |  |
|----------------------------------------------------------------------|--|
| <i>Wenn ja, spielen diese für Ihre Institution eine große Rolle?</i> |  |
| <i>Werden Daten wiederverwendet?</i>                                 |  |
| <i>Geben Sie Daten an Externe weiter (z.B. Dienstleister)?</i>       |  |

## 5 Arbeiter\*innen im Datenbereich

### 5.1 Wieviele Personen arbeiten in Ihrer Firma/Organisation mit den Daten? Haben Sie genügend Personal für die Arbeit mit Daten?

Antwort:

### 5.2 Welche Position haben diese Mitarbeiter\*innen in der Firma/Organisation?

Antwort:

5.3 Verfügen diese Personen über spezifische Ausbildung im Bereich Daten?

Antwort:

5.4 Gibt es spezielle Kurse/Training/Ausbildung, in- oder außerhalb der Organisation/Firma, die Ihre MitarbeiterInnen absolvieren (sollten)? Z.B. disziplinspezifisch, IT Experten

Antwort:

5.5 Welche Kompetenzen werden MitarbeiterInnen in Zukunft im Datenbereich mitbringen müssen, um den Anforderungen am Arbeitsmarkt gerecht zu werden?

Antwort:

## 6 Kollaboratives Arbeiten mit Daten

6.1 Arbeiten Sie kollaborativ mit Daten?

|                                                                          |  |
|--------------------------------------------------------------------------|--|
| Eigene Daten werden mit anderen Organisationen geteilt für Kollaboration |  |
| Es werden Daten aus anderen Organisationen für Kollaboration verwendet   |  |

6.2 Passieren alle Schritte von Generierung, über Analyse bis hin zu finaler Auswertung und Archivierung in-house?

|                                                                           |  |
|---------------------------------------------------------------------------|--|
| Ja                                                                        |  |
| Nein                                                                      |  |
| Diese Schritte werden von anderen gemacht:                                |  |
| Haben Sie Kollaborationen mit anderen Partnern in ihrem/anderen Sektoren: |  |

6.3 Nutzen Sie Ressourcen von Dienstleistungsunternehmen?

|                                                    |  |                  |  |
|----------------------------------------------------|--|------------------|--|
| HPC Cluster Maribor                                |  | Know-Center GmbH |  |
| Externe Cloudressourcen (e.g. Amazon Web Services) |  | Andere:          |  |

6.4 In welchem Rahmen (Umfang, Häufigkeit, Art) findet Datenaustausch statt und wie würden Sie sich diesen wünschen?

Antwort:

## 7 Internationale Netzwerke

7.1 In welche Netzwerke ist Ihre Institution eingegliedert?

|     |  |      |  |         |  |         |  |
|-----|--|------|--|---------|--|---------|--|
| RDA |  | EOSC |  | EuroHPC |  | Andere: |  |
|-----|--|------|--|---------|--|---------|--|

## 8 Bewertung Steiermark

8.1 Wie sehen Sie die derzeitige Dateninfrastruktur in der Steiermark?

*Skala 1 – 5, (1) = nicht ausreichend, (5) = sehr gut, (0) = keine Kenntnis/trifft nicht zu*

|                                 |  |
|---------------------------------|--|
| Speicher- und Rechenkapazitäten |  |
| Internetgeschwindigkeit         |  |
| Anbindung an Netzwerke          |  |
| Kollaborationsmöglichkeiten     |  |
| Förderung von Land Steiermark   |  |
| Andere:                         |  |

8.2 Wie kann, Ihrer Meinung nach, die Zusammenarbeit der unterschiedlichen Stakeholder verbessert werden? *Skala 1 – 5, (1) = nicht wichtig, (5) = sehr wichtig*

|                                              |  |
|----------------------------------------------|--|
| Durch eine neue Kollaborationsplattform      |  |
| Durch verbesserte Informationsnetzwerke      |  |
| Durch erweiterte Kollaborationsmöglichkeiten |  |
| Durch mehr Förderung vom Land                |  |
| Andere:                                      |  |

## 9 Dateninfrastrukturen in Zukunft

9.1 Wie sieht die Zukunftsperspektive/Strategie bei Ihrer Organisation/Firma in Bezug auf Daten aus?

| <i>Die folgenden Sätze in einer Skala 1 (stimmt nicht) bis 5 (trifft voll zu) bewerten</i>                          |  |
|---------------------------------------------------------------------------------------------------------------------|--|
| Der Bedarf an Dateninfrastrukturen für meine Firma/Organisation wird wachsen und wichtiger für den Betrieb/Business |  |
| ...                                                                                                                 |  |

9.2 Sind größere Änderungen geplant?

|                                 |  |                                               |  |
|---------------------------------|--|-----------------------------------------------|--|
| Aufbau von Kompetenzen in-house |  | Aufbau von Cloudsystemen                      |  |
| Anschaffung von Ressourcen      |  | Konsultation von externen Experten/Ressourcen |  |
| Andere:                         |  |                                               |  |

Wir bedanken uns für die Teilnahme an der Interviewstudie!
